# Supplementary material for: Annual Protist Community Dynamics in a Freshwater Ecosystem Undergoing Contrasted Climatic Conditions: The Saint-Charles River (Canada)
Source: Front Microbiol. 2019 Oct 16;10:2359. doi: 10.3389/fmicb.2019.02359 (PMC6805768; doi:10.3389/fmicb.2019.02359)
Supplement: Supplementary file 15 [file Table_1.XLSX]

## Sheet: Modifié_Vannes_Debit
Sampling date	UV Absorbance (/5 cm)	Alcalinity (mg/l CaCO3)	Total nitrogen (mg N/l)	DOC (mg C/l)	TOC (mg C/l)	Total coliforms (UFC/100 ml)	Conductivity (µmhos/cm)	Apparent colour (UCA)	Escherichia coli (UFC/100 ml)	Nitrites et nitrates (mg N/l)	pH ()	Total phosphorus (µg P/l)	Turbidity (UNT)	Water temperature (°C)	Air temperature (°C)	Snow cover (cm)	River flow (m3/s)	Opening of floodgates (m)	Rainfall / Day-1	Rainfall / Day-2	Rainfall / Day-3
2016-05-24	0.796	20	0.439	3.4	3.83	400	104	25	7	0.26	7.3	11.8	1.76	15.4965	19.1	0	8.096	0.26	0	0	0
2016-05-31	1.08	16.8	0.434	4.8	5.1	890	87.7	43	290	0.18	7.3	21	3.1	17.422	17.6	0	16.78	0.78	23.25	8	0
2016-06-07	1.52	11.3	0.342	7.9	8.6	3200	61.2	58	220	0.14	7.2	49.2	3.69	16.0164	16.2	0	46.32	1.69	14.7	34.7	0
2016-06-14	1.12	20.5	0.394	5.2	5.7	680	99	40	28	0.21	7.4	13.2	2.07	14.8185	16.6	0	8.294	0.2	3.8	12	0
2016-06-20	0.87	23.9	0.49	4.4	4.83	540	116	31	41	0.25	7.3	14.6	2.04	20.0837	24.1	0	3.314	0.09	0	0	0
2016-06-28	0.81	30.6	0.487	4.3	4.54	520	145	30	50	0.28	7.4	13.7	2.33	20.2645	21.7	0	2.939	0.11	3.6	0	0
2016-07-05	0.807	28.2	0.472	3	4.25	1100	138	31	80	0.26	7.4	17.1	2.31	20.1958	21.1	0	1.45	0.02	0.85	0	3.05
2016-07-12	0.913	28.6	0.471	3.7	4.6	840	130	33	80	0.24	7.3	12.6	1.99	18.8676	19.5	0	2.774	0.07	0.65	6.2	6.55
2016-07-19	1.87	36.3	NA	6.7	7.6	12000	153	111	2400	0.21	7.4	44.2	16	19.4649	15.1	0	5.092	0.12	20.6	0	0
2016-07-26	0.83	34.3	0.502	4.6	4.45	1200	153	35	200	0.19	7.3	21.1	3.1	21.0221	21.7	0	5.779	0.33	16.8	0	0
2016-08-02	0.75	32.1	0.447	3	3.32	400	145	30	68	0.2	7.4	18.3	2.32	21.6725	19.9	0	1.049	0	0	0	0
2016-08-09	0.792	32.6	0.455	3.3	3.54	460	148	32	76	0.21	7.5	20.5	2.63	20.8791	14.8	0	1.117	0	0	1.9	0.3
2016-08-16	0.872	35.7	0.474	3.5	3.97	1600	175	31	110	0.22	7.4	14.6	2.53	19.9051	NA	0	1.007	0	0.4	5.6	2.8
2016-08-30	0.823	31.7	0.433	5.5	4.04	560	156	48	61	0.17	7.3	33.9	5.38	19.9848	17.6	0	1.345	0	0	0	0
2016-09-16	0.968	28.3	0.41	7	6.4	540	130	36	54	0.16	7.4	13.9	2.58	16.4473	10.6	0	3.241	0.08	0	1.55	0
2016-09-29	0.955	28.9	0.434	6	5.6	410	130	36	23	0.21	7.4	13.7	2.5	12.9656	8.3	0	1.971	0	0	2.5	0
2016-10-24	1.98	12.7	0.405	7.6	9.3	2700	62.6	81	270	0.12	6.9	117	5.92	8.42627	3.9	0	57.48	1.7	16	36.25	38.65
2016-11-08	1.13	24.5	0.455	4.4	5.1	790	121	39	5	0.26	7.3	24.3	2.39	4.80476	4.3	0	5.887	0.19	0	0	0.1
2016-11-21	1.19	22.1	0.408	3.5	3.54	920	95.2	49	250	0.23	7.3	13.8	3.57	6.02479	0.2	0	11.82	0.51	0	0	0
2016-12-08	0.85	26.4	NA		3.79	230	135	30	56	0.33	7.3	8.7	1.82	2.02033	-2	14	2.94	0.1	0	0	0
2017-01-12	0.656	29.3	0.618	2.6	4.74	110	161	24	13	0.43	7.1	8.1	1.62	1.38031	0.8	56	3.28	0	0	0	0
2017-01-26	0.636	29.4	0.624	2.8	3.09	130	164	23	6	0.45	7.4	8.4	1.46	1.23951	-1.9	57	1.85	0	0	0	0
2017-02-10	NA	NA	NA	NA	NA	NA	NA	NA	NA	NA	NA	NA	NA	1.39951	-19.6	53	0.915	0	0	0	0
2017-02-23	0.606	35.4	0.878	2.2	2.8	130	241	26	6	0.58	7.1	8.9	2.38	1.58821	2.1	54	1.99	0.18	0	0	0
2017-03-09	0.832	24.6	0.693		3.62	250	234	34	7	0.4	7	12.2	2.76	1.97415	-5.1	43	7.44	0.27	0	0	0
2017-03-23	0.675	29.1	0.689	2.6	3.15	82	236	26	2	0.46	7.2	10.4	2.18	1.08237	-10.6	45	3.66	0.1	0	0	0
2017-04-06	0.71	29.2	0.62	2.6	2.87	160	226	30	55	0.48	7.2	9.4	2.58	2.56155	2.4	51	11.3	1.03	0	0	0
2017-04-20	1.01	13.7	0.438	4.1	4.43	290	98.9	42	22	0.26	7	15.1	3.65	3.52625	5.1	0	39.56	1.7	4.2875	0	0
2017-05-04	0.964	8.8	0.383	3.6	4.19	240	64.9	33	8	0.19	6.8	11.3	2.75	7.19179	7.3	0	58.83	1.7	2.25	2	35.4
2017-05-17	0.846	17.4	0.377	3.2	3.88	640	113	30	12	0.21	7.2	11.9	1.9	12.7563	12.4	0	10.69	0.5	0	0.15	5.7
2017-06-01	0.723	22.2	0.407	3.2	3.51	360	118	27	150	0.22	7.5	12.8	1.95	15.2857	13.7	0	7.424	0.3	2.1	4.25	0
2017-06-15	0.876	29.9	0.331	3.5	3.28	1100	144	45	61	0.39	7.5	29.3	5.22	18.8898	13.1	0	2.118	0.1	0	0.1	3.2
2017-06-28	0.937	25.2	0.38	6.4	4.56	560	123	35	52	0.21	7.3	19	2.36	17.9796	15.3	0	7.467	0	6.5	0.75	0.05
2018-01-31	0.701	22.9	0.724	NA	NA	140	136	25	1	0.39	7.1	14.1	1.82	0.71151	-16.6	55	2.86	0	NA	NA	NA
2018-02-12	0.622	26.4	0.719	NA	NA	120	143	22	5	0.41	7.2	10.6	1.81	0.800587	-6.5	77	2.55	0	NA	NA	NA
TableS1: Environmental, physico-chemical and microbiological parameters measured at each sampling dates.
